# Supplementary material for: Anti-Inflammatory and Anticoagulant Activities of Synthesized NSAID Prodrug Esters
Source: Hindawi journal article supplement (doi:10.1155/2020/9817502), 2020-05-26
Supplement: f1 [file 9817502.f1.pdf]

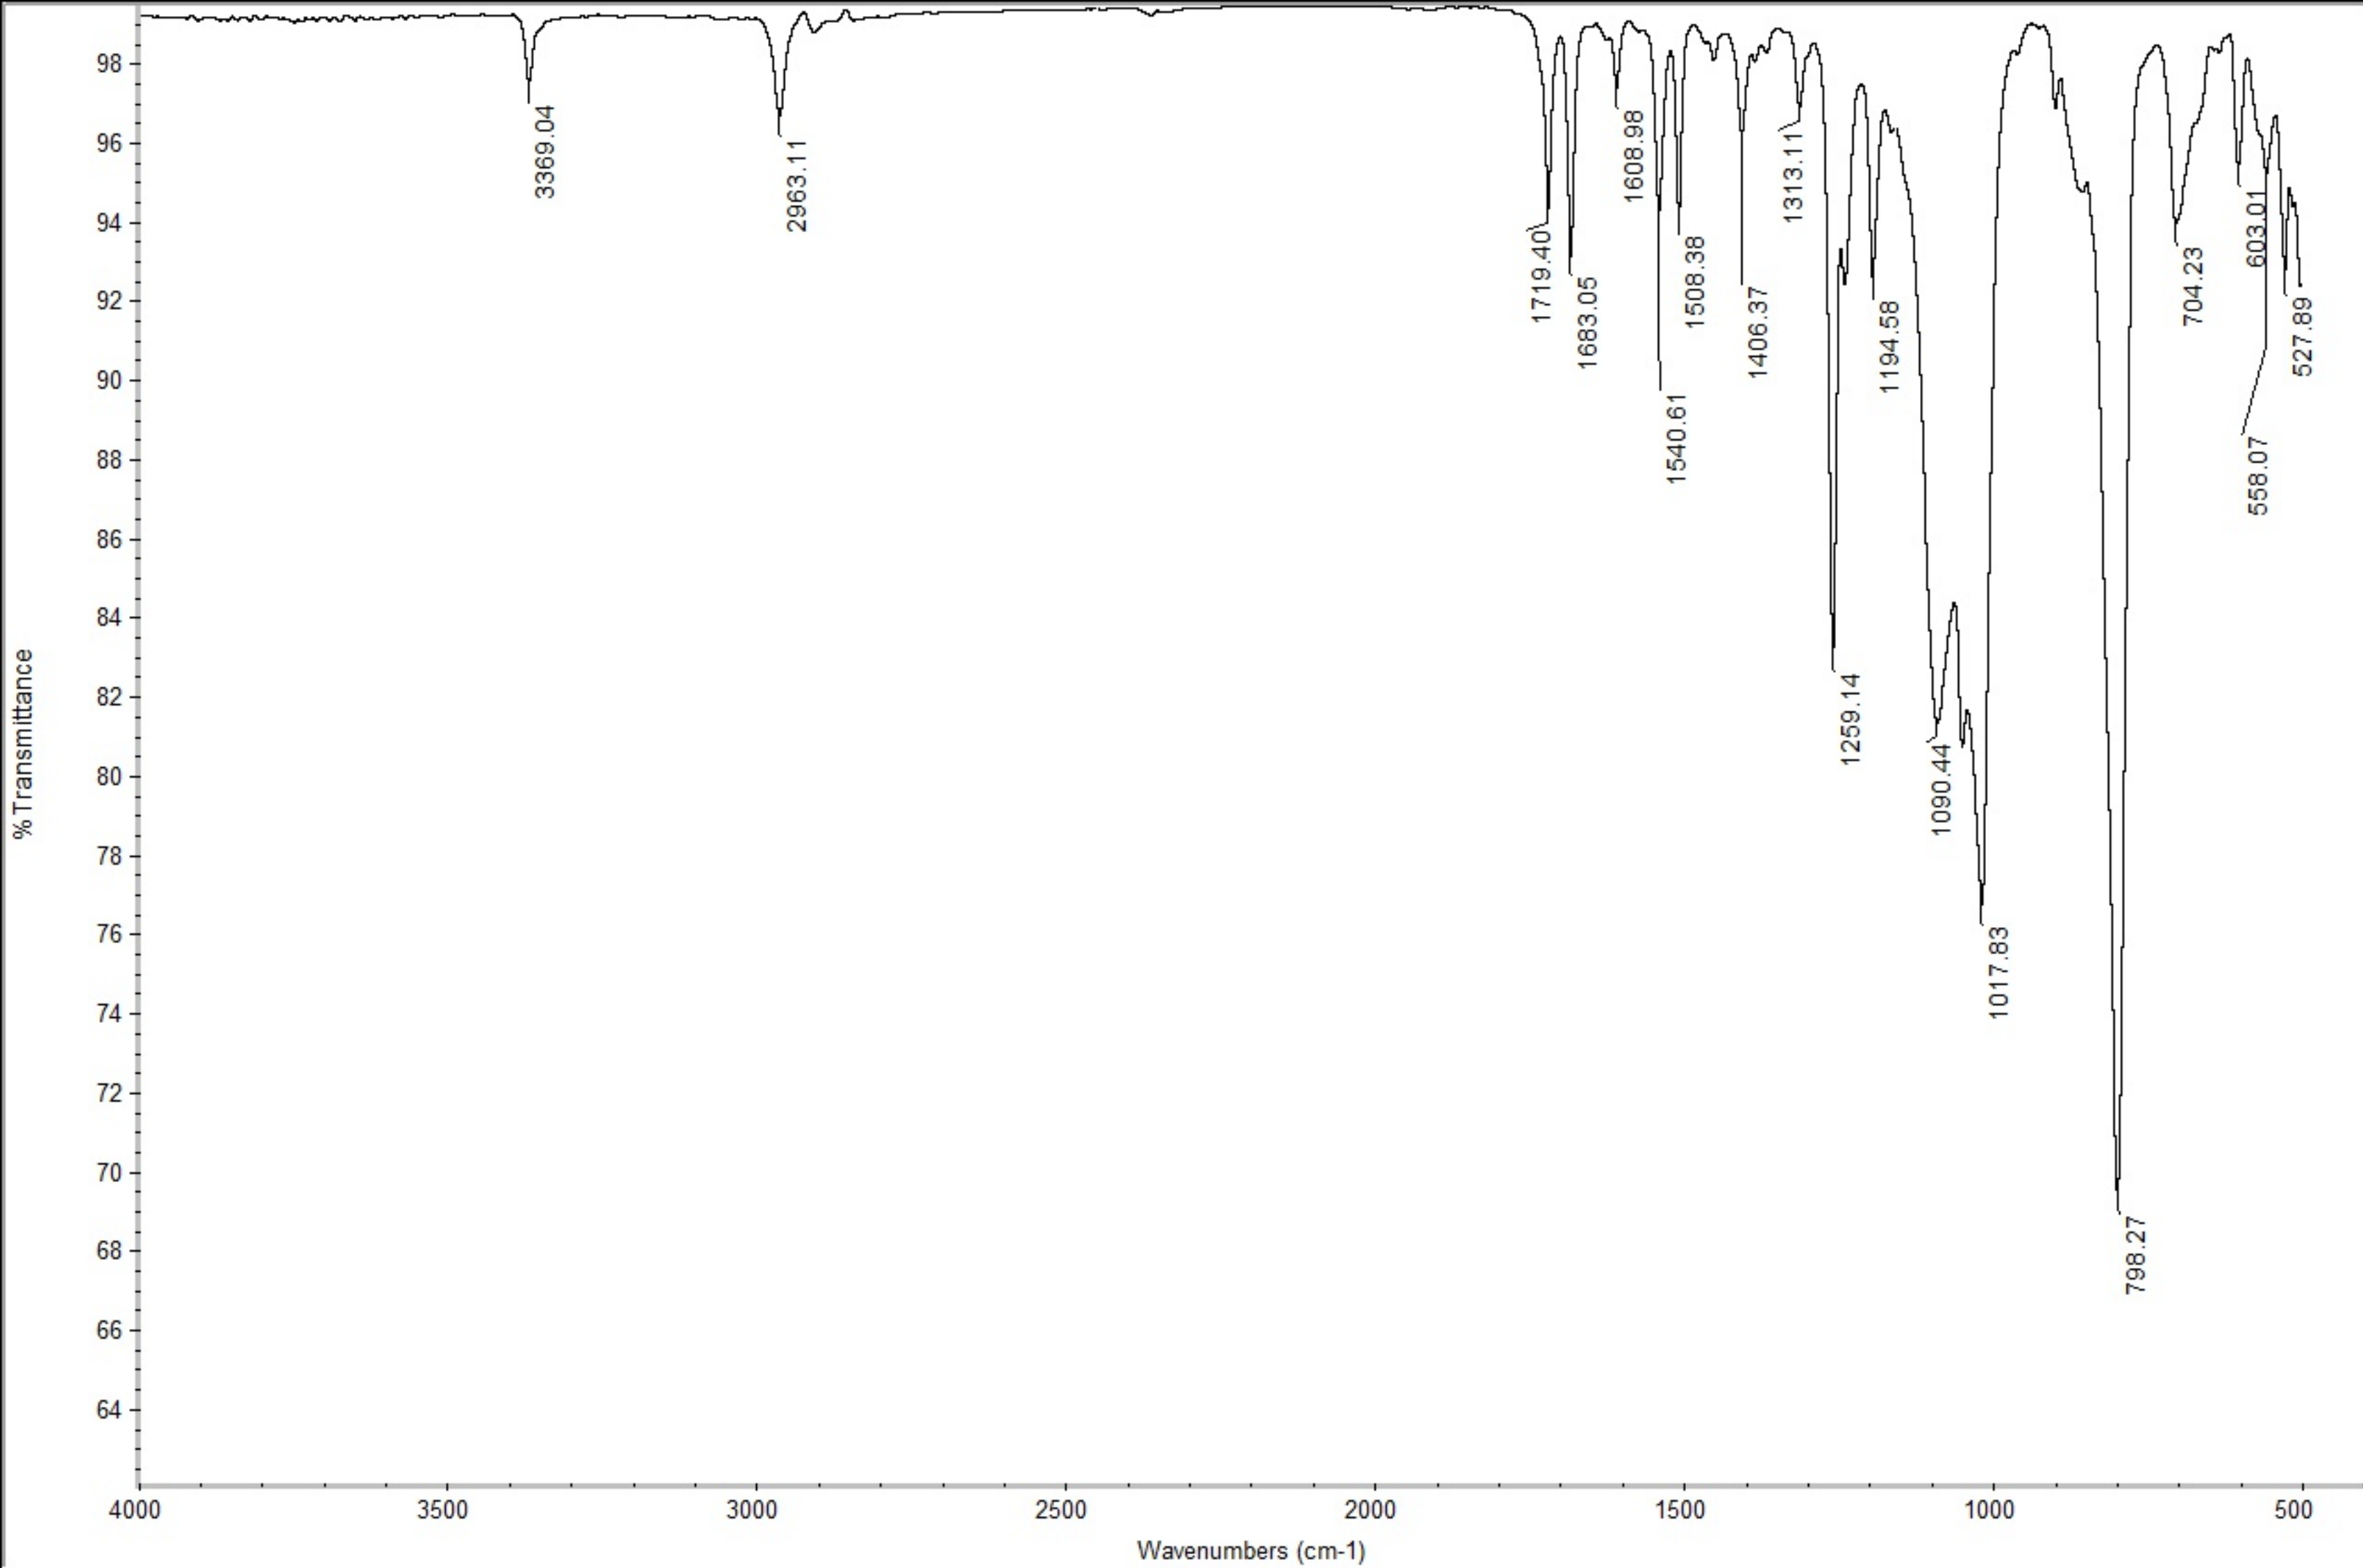

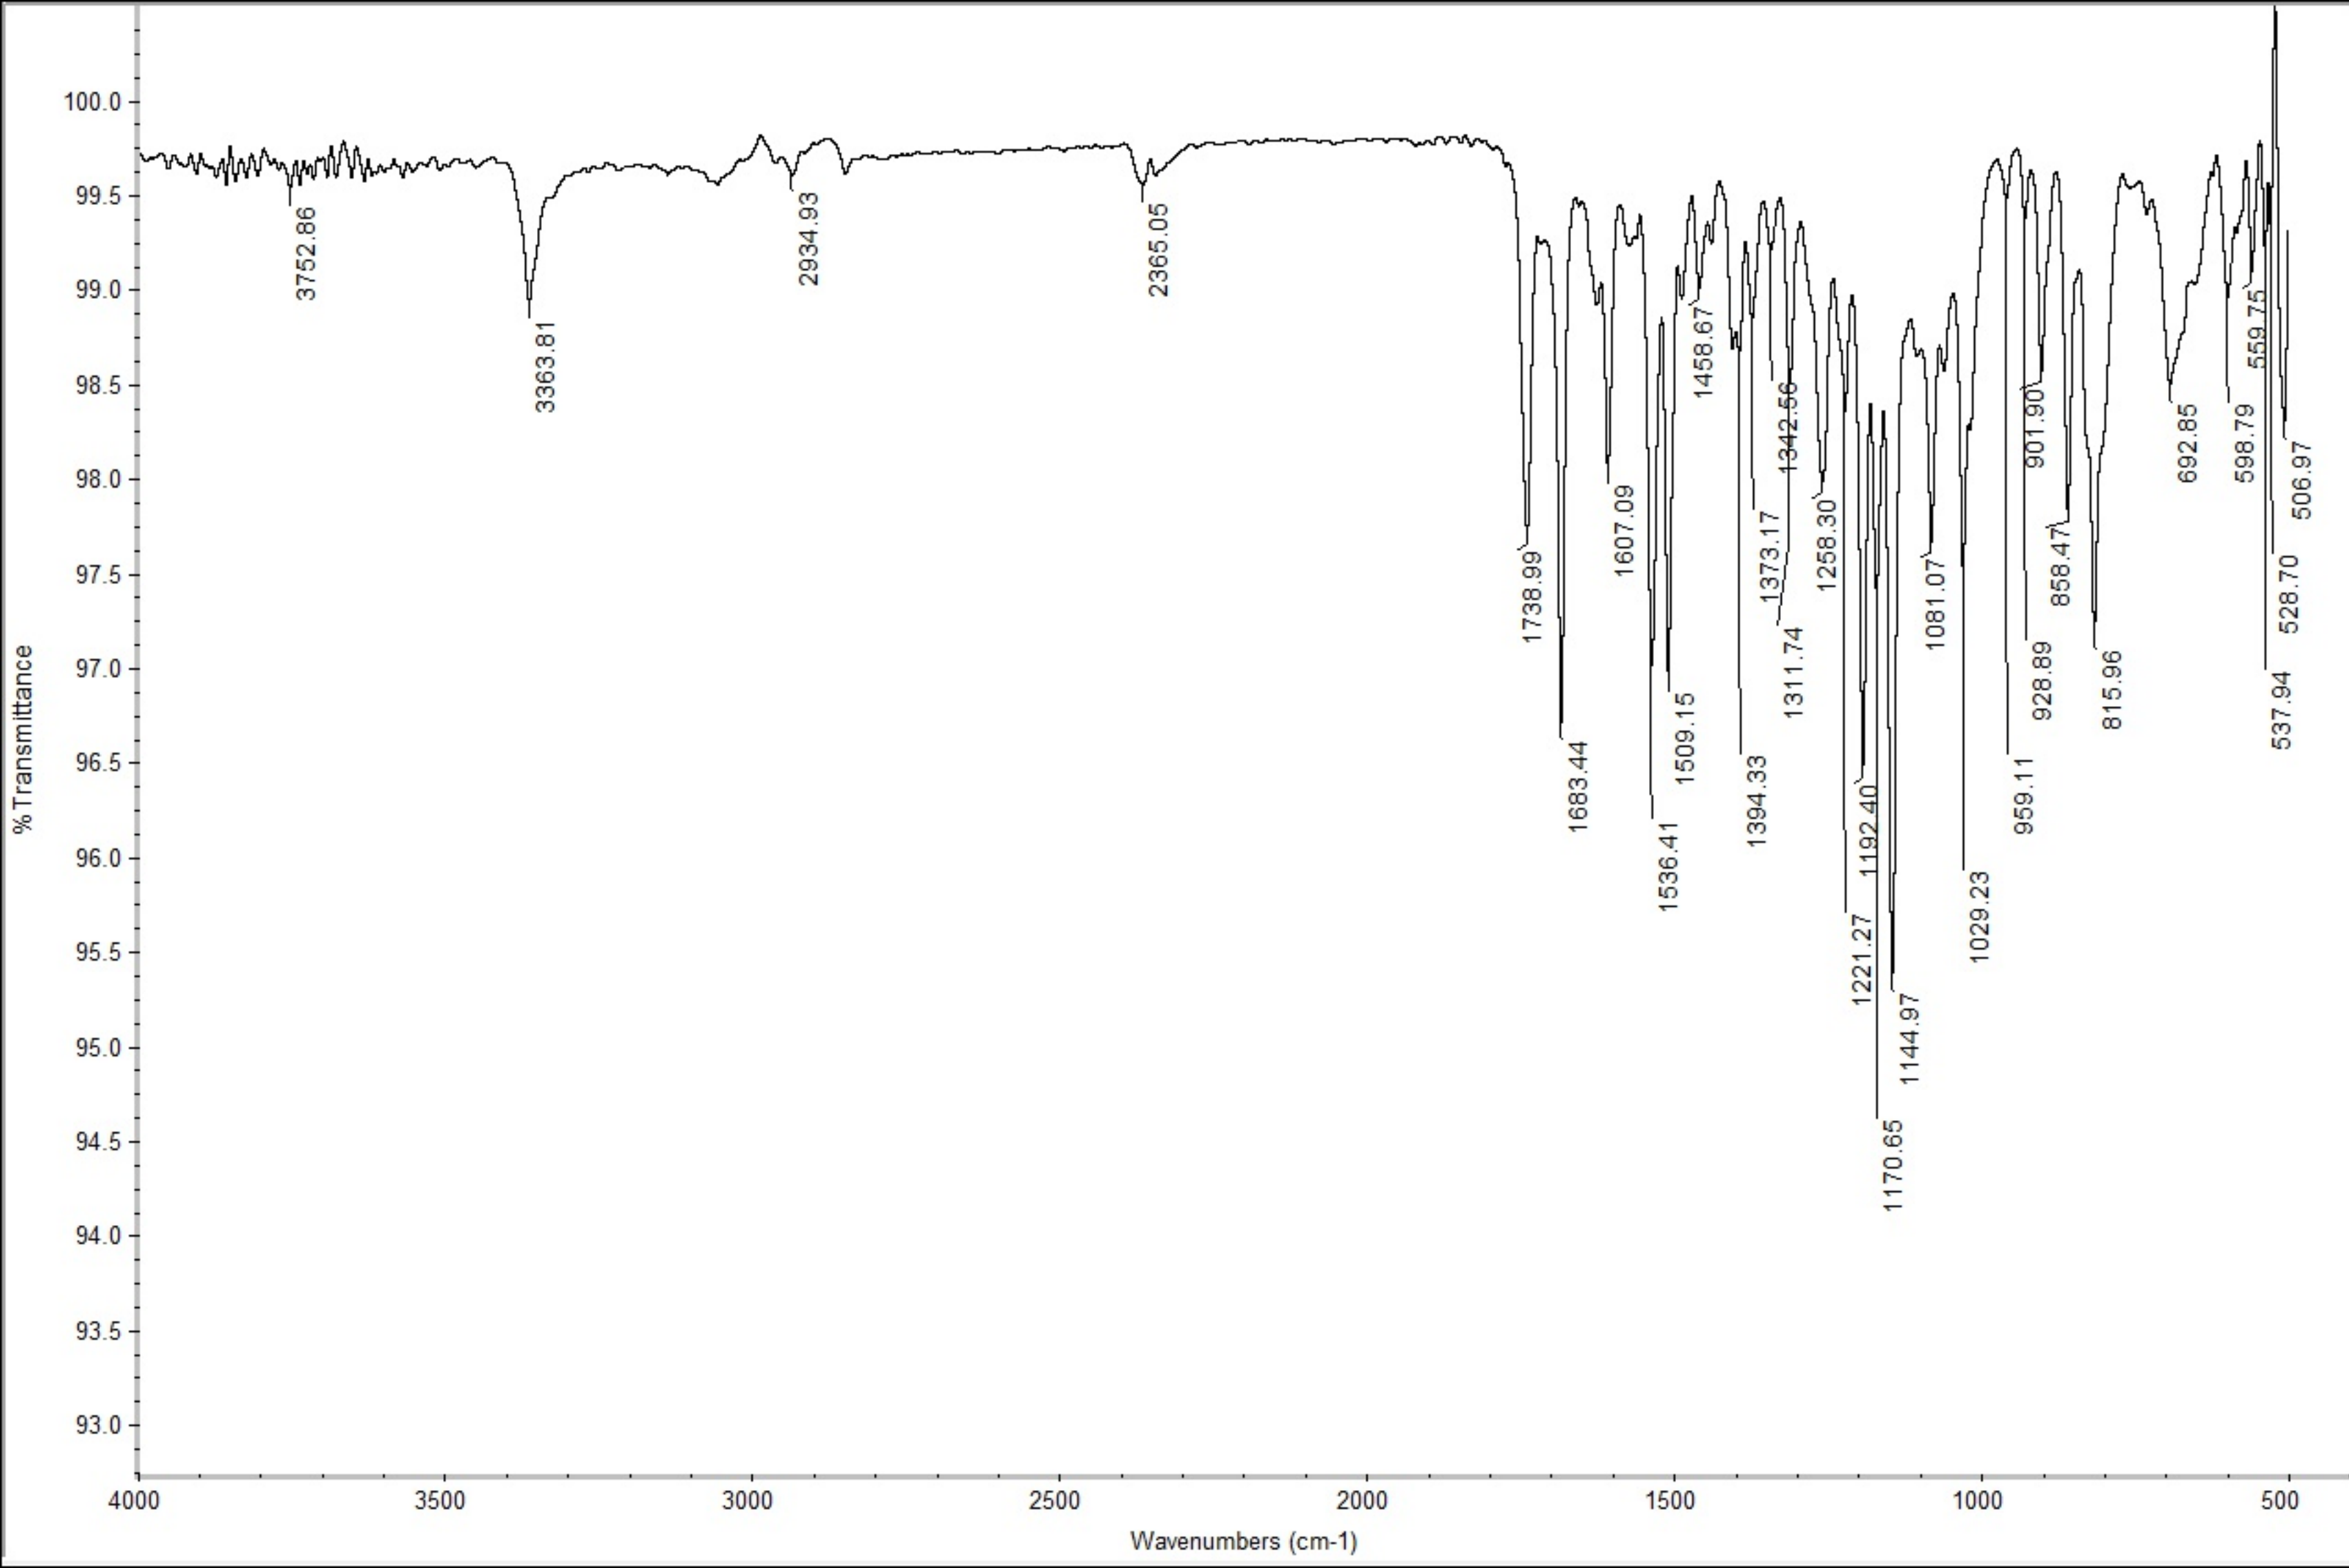

|                               |                      |                          |                                                                               |                               |                      |
|-------------------------------|----------------------|--------------------------|-------------------------------------------------------------------------------|-------------------------------|----------------------|
| <b>Acquisition Time (sec)</b> | 5.6623               | <b>Comment</b>           | PROTON NMR                                                                    | <b>Date</b>                   | 26 May 2015 13:29:04 |
| <b>Date Stamp</b>             | 26 May 2015 13:29:04 | <b>File Name</b>         | C:\Users\Abu-Hasan\Desktop\NMR Results\MURAD NMR samples\FID\341 Ibu para\fid |                               |                      |
| <b>Frequency (MHz)</b>        | 300.13               | <b>Nucleus</b>           | 1H                                                                            | <b>Number of Transients</b>   | 2                    |
| <b>Original Points Count</b>  | 32768                | <b>Owner</b>             | Administrator                                                                 | <b>Points Count</b>           | 32768                |
| <b>Receiver Gain</b>          | 228.10               | <b>SW(cyclical) (Hz)</b> | 5787.04                                                                       | <b>Pulse Sequence</b>         | zg                   |
| <b>Spectrum Offset (Hz)</b>   | 2514.6892            | <b>Spectrum Type</b>     | STANDARD                                                                      | <b>Solvent</b>                | CHLOROFORM-d         |
|                               |                      |                          |                                                                               | <b>Sweep Width (Hz)</b>       | 5786.86              |
|                               |                      |                          |                                                                               | <b>Temperature (degree C)</b> | 25.160               |

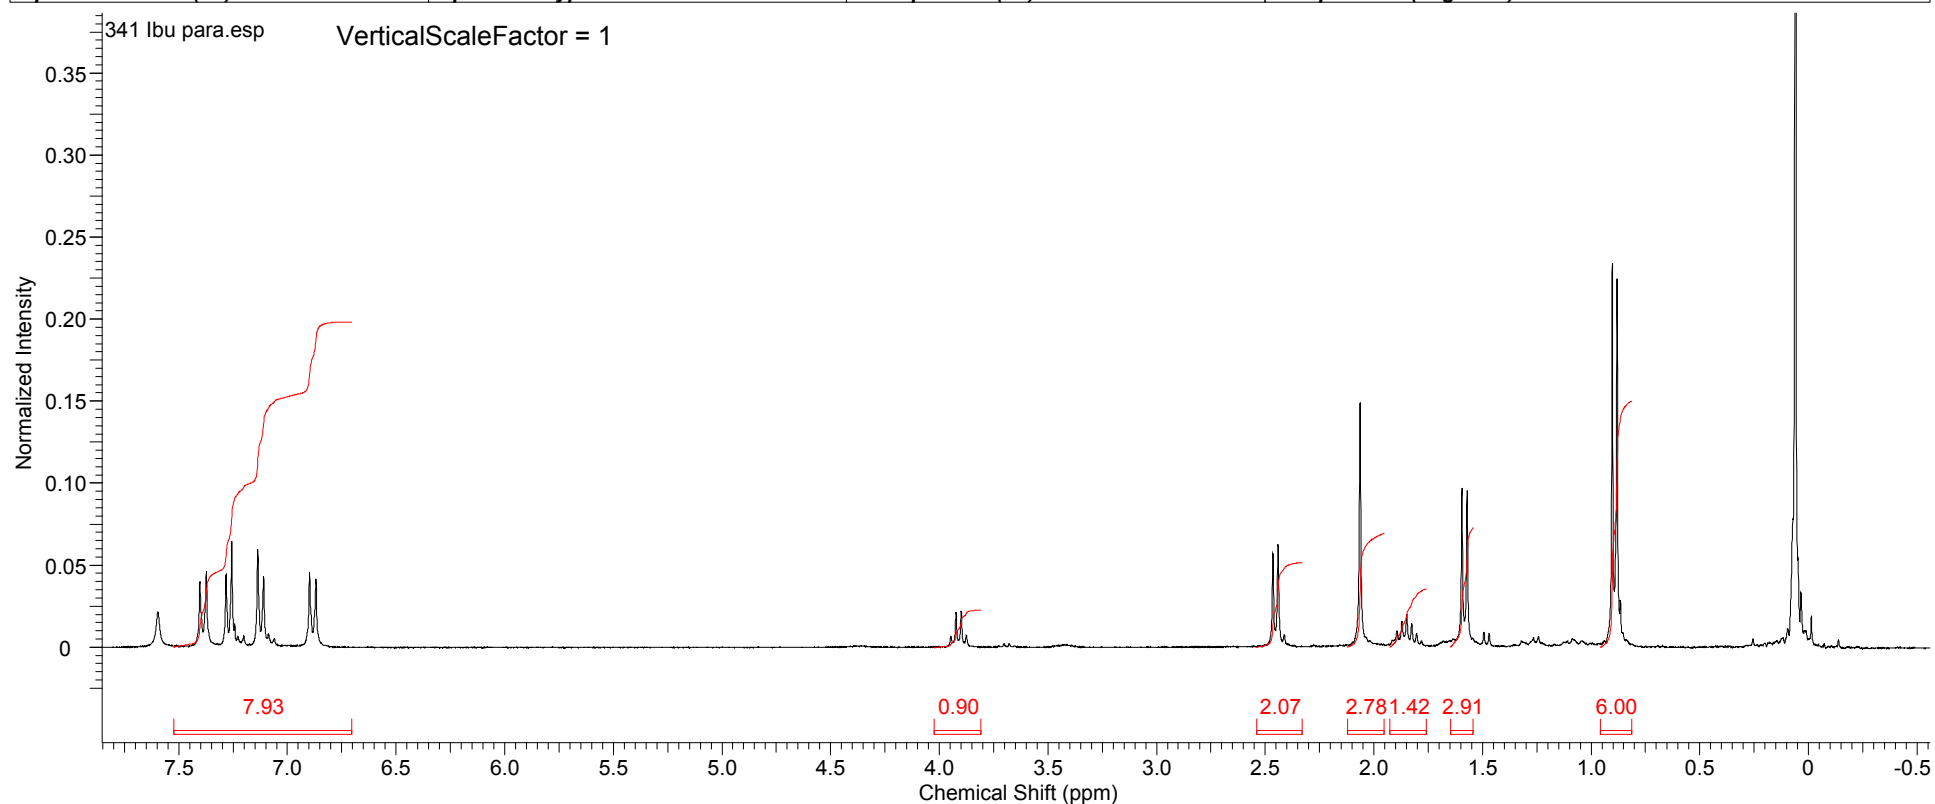

| No. | (ppm)             | Value      | Absolute Value | Non-Negative Value |
|-----|-------------------|------------|----------------|--------------------|
| 1   | [0.8138 .. 0.956] | 0.00000000 | 1.77176848e+8  | 6.00000000         |
| 2   | [1.5427 .. 1.642] | 9.1449881  | 8.60636160e+7  | 2.91449881         |
| 3   | [1.7575 .. 1.921] | 4.2291367  | 4.20178920e+7  | 1.42291367         |
| 4   | [1.9527 .. 2.122] | 7.8008389  | 8.20944160e+7  | 2.78008389         |
| 5   | [2.3302 .. 2.532] | 2.06588745 | 6.10045680e+7  | 2.06588745         |
| 6   | [3.8076 .. 4.020] | 0.90332675 | 2.66747640e+7  | 0.90332675         |
| 7   | [6.7037 .. 7.527] | 7.92728662 | 2.34088608e+8  | 7.92728662         |

|                               |                      |                          |                                                                               |                               |                      |
|-------------------------------|----------------------|--------------------------|-------------------------------------------------------------------------------|-------------------------------|----------------------|
| <b>Acquisition Time (sec)</b> | 5.6623               | <b>Comment</b>           | PROTON NMR                                                                    | <b>Date</b>                   | 26 May 2015 13:24:48 |
| <b>Date Stamp</b>             | 26 May 2015 13:24:48 | <b>File Name</b>         | C:\Users\Abu-Hasan\Desktop\NMR Results\MURAD NMR samples FID\351 Nap Para\fid |                               |                      |
| <b>Frequency (MHz)</b>        | 300.13               | <b>Nucleus</b>           | 1H                                                                            | <b>Number of Transients</b>   | 3                    |
| <b>Original Points Count</b>  | 32768                | <b>Owner</b>             | Administrator                                                                 | <b>Points Count</b>           | 32768                |
| <b>Receiver Gain</b>          | 812.70               | <b>SW(cyclical) (Hz)</b> | 5787.04                                                                       | <b>Solvent</b>                | CHLOROFORM-d         |
| <b>Spectrum Offset (Hz)</b>   | 2514.6892            | <b>Spectrum Type</b>     | STANDARD                                                                      | <b>Sweep Width (Hz)</b>       | 5786.86              |
|                               |                      |                          |                                                                               | <b>Temperature (degree C)</b> | 25.160               |

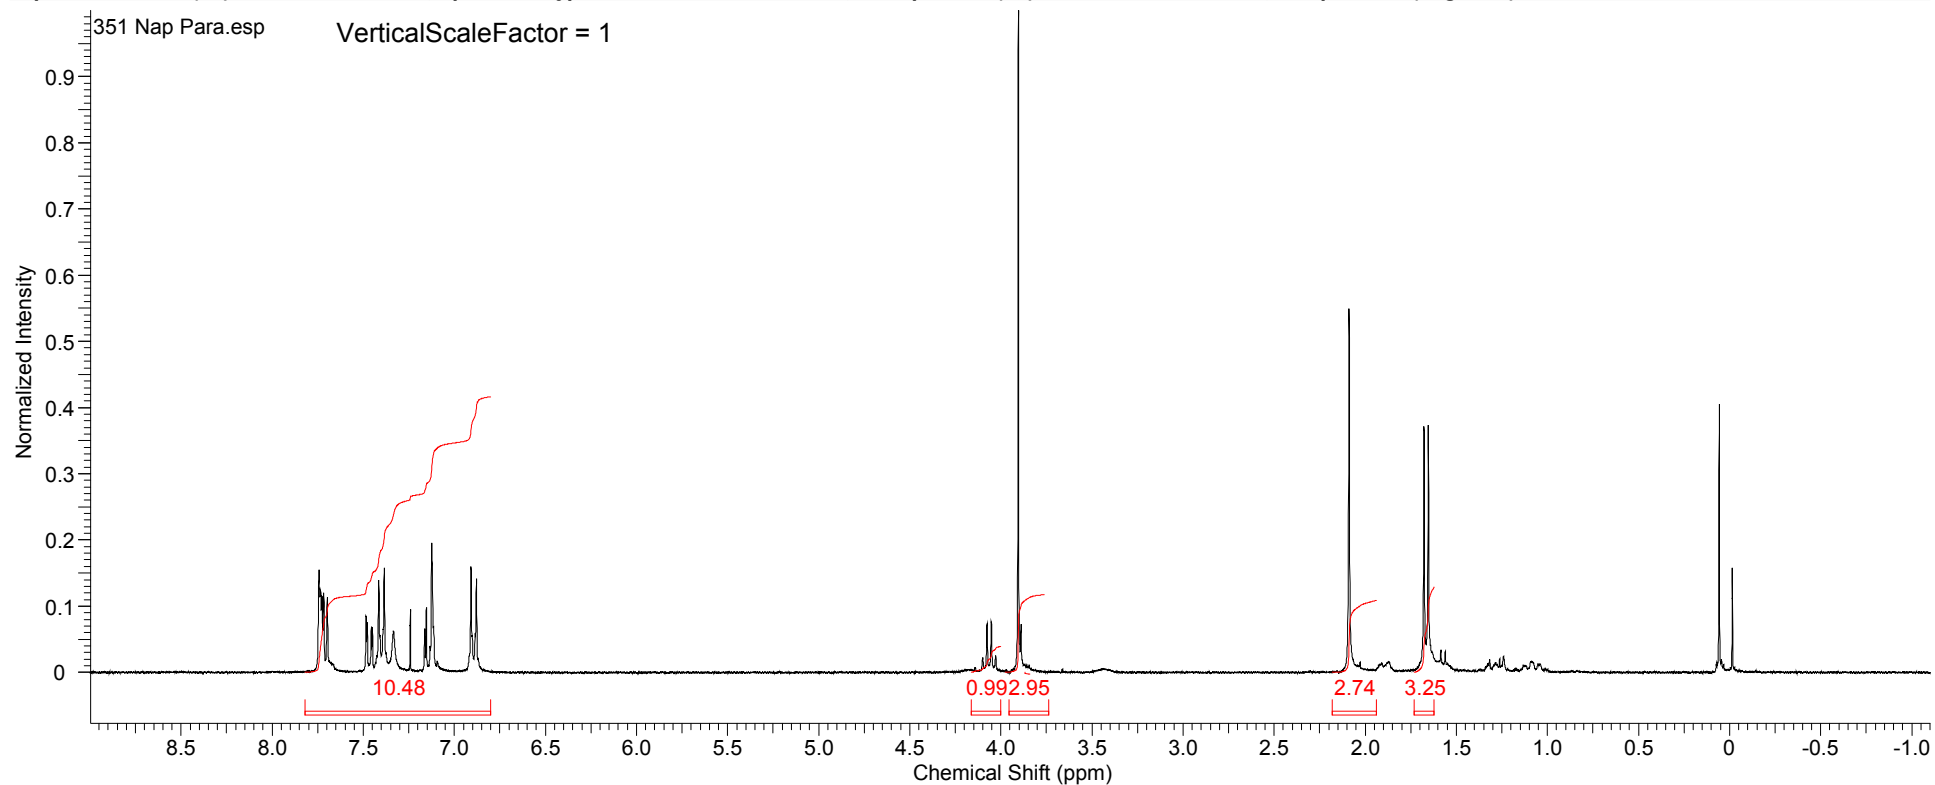

| No. | (ppm)            | Value       | Absolute Value | Non-Negative Value |
|-----|------------------|-------------|----------------|--------------------|
| 1   | [1.6213 .. 1.733 | 2.24557924  | 2.06476336e+8  | 3.24557924         |
| 2   | [1.9401 .. 2.182 | 2.73576188  | 1.74042928e+8  | 2.73576188         |
| 3   | [3.7595 .. 3.972 | 2.95251870  | 1.87832496e+8  | 2.95251870         |
| 4   | [4.0005 .. 4.160 | 0.98522657  | 6.26778640e+7  | 0.98522657         |
| 5   | [6.7996 .. 7.811 | 10.47621346 | 6.66472768e+8  | 10.47621346        |
